# Supplementary material for: Mapping global cropland potential to deliver iron and zinc where they are most needed
Source: Research Square preprint supplement (doi:10.21203/rs.3.rs-7983932/v1), 2025-11-21
Supplement: Supplementary file 1 [file c3a7ee612bf1db153d7fc682.xlsx]

## Sheet: Supplementary Data (SD) 1a
Supplementary Data 1a: Nutrient Composition, Contribution, and Weighted Contribution of Crops for Iron and Zinc
Crops	Iron (mg)	Iron NC (%)	Iron WC (%)	Zinc (mg)	Zinc NC (%)	Zinc WC (%)	Global CNS
Cocoa	13.9	62.05	38.47	6.81	66.76	25.37	63.84
Soybean	15.7	70.09	43.46	4.89	47.94	18.22	61.67
Cowpea	9.95	44.42	27.54	6.11	59.9	22.76	50.3
Peal millet	8	35.71	22.14	3.1	30.39	11.55	33.69
Sunflower	5.25	23.44	14.53	5	49.02	18.63	33.16
Flax	5.73	25.58	15.86	4.34	42.55	16.17	32.03
Phaseolus bean	7.51	33.53	20.79	2.83	27.75	10.54	31.33
Dry pea	5.93	26.47	16.41	3.65	35.78	13.6	30.01
Wetland rice	1.96	8.75	5.43	5.96	58.43	22.2	27.63
Oat	5.41	24.15	14.97	3.11	30.49	11.59	26.56
Wheat	3.52	15.71	9.74	4.16	40.78	15.5	25.24
Groundnut	4.58	20.45	12.68	3.27	32.06	12.18	24.86
Pigeonpea	5.23	23.35	14.48	2.76	27.06	10.28	24.76
Chickpea	4.31	19.24	11.93	2.76	27.06	10.28	22.21
Rye	2.63	11.74	7.28	2.65	25.98	9.87	17.15
Foxtail millet	2.8	12.5	7.75	2.4	23.53	8.94	16.69
Biomass sorghum	3.36	15	9.3	1.67	16.37	6.22	15.52
Sorghum	3.36	15	9.3	1.67	16.37	6.22	15.52
Buckwheat	2.2	9.82	6.09	2.4	23.53	8.94	15.03
Barley	2.5	11.16	6.92	2.13	20.88	7.94	14.85
Coconut	2.43	10.85	6.73	1.1	10.78	4.1	10.82
Dry rice	1.24	5.54	3.43	1.85	18.14	6.89	10.32
Alfalfa	0.96	4.29	2.66	0.92	9.02	3.43	6.08
Cassava	0.7	3.13	1.94	0.34	3.33	1.27	3.2
Sweet potato	0.61	2.72	1.69	0.3	2.94	1.12	2.81
White potato	0.52	2.32	1.44	0.29	2.84	1.08	2.52
Yam	0.54	2.41	1.49	0.24	2.35	0.89	2.39
Cabbage	0.47	2.1	1.3	0.18	1.76	0.67	1.97
Carrot	0.3	1.34	0.83	0.24	2.35	0.89	1.72
Olive	0.49	2.19	1.36	0.04	0.39	0.15	1.51
Tomato	0.27	1.21	0.75	0.17	1.67	0.63	1.38
Citrus	0.33	1.47	0.91	0.11	1.08	0.41	1.32
Banana	0.26	1.16	0.72	0.15	1.47	0.56	1.28
Onion	0.21	0.94	0.58	0.17	1.67	0.63	1.21
Oil palm	0.1	0.45	0.28	0	0	0	0.28
Tea	0.01	0.04	0.03	0.01	0.1	0.04	0.06
Rapeseed	0	0	0	0	0	0	0
Note: The table presents the nutrient composition of crops in terms of iron and zinc content per 100 grams of raw crop, listed in descending order of their combined nutrient score (CNS). For each nutrient, the Nutrient Contribution (NC) is expressed as the percentage of the Harmonized Average Requirement (H-AR) met, while the Weighted Contribution (WC) reflects the relative importance of the nutr…

## Sheet: Global and regional CNS_SD_1b
Supplementary Data 1 | Combined Nutrient Scores (CNS) for selected crops across global regions.
North Africa NS		Western Africa NS		Middle Africa NS		Eastern Africa NS		Southern Africa NS		Central Asia NS		Eastern Asia NS		Southern Asia NS		Southeastern Asia NS		Western Asia NS		Northern Europe NS		Western Europe NS		Southern Europe NS		Eastern Europe NS		Australia/New Zealand NS		Melanesia NS		Micronesia NS		Polynesia NS		Northern America NS		Central America		Caribbean NS		South America NS			Global NS
Crops	CNS	Crops	CNS	Crops	CNS	Crops	CNS	Crops	CNS	Crops	CNS	Crops	CNS	Crops	CNS	Crops	CNS	Crops	CNS	Crops	CNS	Crops	CNS	Crops	CNS	Crops	CNS	Crops	CNS	Crops	CNS	Crops	CNS	Crops	CNS	Crops	CNS	Crops	CNS	Crops	CNS	Crops	CNS		Crops	CNS
Cocoa	63.6554	Cocoa	63.6554	Cocoa	63.8438	Cocoa	64.1265	Cocoa	64.4563	Soybean	65.2167	Cocoa	64.0794	Cocoa	63.9851	Cocoa	63.6554	Cocoa	63.9851	Cocoa	63.4669	Cocoa	63.6554	Cocoa	63.5611	Cocoa	63.7967	Cocoa	63.4669	Soybean	64.3308	Cocoa	63.7496	Cocoa	63.7496	Cocoa	64.1265	Cocoa	64.8331	Cocoa	63.8438	Cocoa	63.7496		Cocoa	63.8438
Soybean	62.5589	Soybean	62.5589	Soybean	61.673	Soybean	60.3441	Soybean	58.7938	Cocoa	63.09	Soybean	60.5656	Soybean	61.0086	Soybean	62.5589	Soybean	61.0086	Soybean	63.4449	Soybean	62.5589	Soybean	63.0019	Soybean	61.8945	Soybean	63.4449	Cocoa	63.2785	Soybean	62.116	Soybean	62.116	Soybean	60.3441	Soybean	57.0219	Soybean	61.673	Soybean	62.116		Soybean	61.673
Cowpea	49.6836	Cowpea	49.6836	Cowpea	50.3029	Cowpea	51.2319	Cowpea	52.3156	Cowpea	47.8258	Cowpea	51.077	Cowpea	50.7674	Cowpea	49.6836	Cowpea	50.7674	Cowpea	49.0643	Cowpea	49.6836	Cowpea	49.374	Cowpea	50.1481	Cowpea	49.0643	Cowpea	48.445	Cowpea	49.9933	Cowpea	49.9933	Cowpea	51.2319	Cowpea	53.5542	Cowpea	50.3029	Cowpea	49.9933		Cowpea	50.3029
Peal millet	33.9048	Peal millet	33.9048	Peal millet	33.6919	Sunflower	34.6936	Sunflower	36.4844	Peal millet	34.5434	Sunflower	34.4378	Sunflower	33.9262	Peal millet	33.9048	Sunflower	33.9262	Peal millet	34.1176	Peal millet	33.9048	Peal millet	34.0112	Peal millet	33.7451	Peal millet	34.1176	Peal millet	34.3305	Peal millet	33.7983	Peal millet	33.7983	Sunflower	34.6936	Sunflower	38.5309	Peal millet	33.6919	Peal millet	33.7983		Peal millet	33.6919
Sunflower	32.1354	Sunflower	32.1354	Sunflower	33.1587	Peal millet	33.3725	Flax	34.2344	Phaseolus bean	32.2548	Peal millet	33.4258	Peal millet	33.5322	Sunflower	32.1354	Peal millet	33.5322	Phaseolus bean	31.7923	Sunflower	32.1354	Phaseolus bean	31.6766	Sunflower	32.9029	Phaseolus bean	31.7923	Phaseolus bean	32.0235	Sunflower	32.6471	Sunflower	32.6471	Peal millet	33.3725	Wetland rice	38.062	Sunflower	33.1587	Sunflower	32.6471		Sunflower	33.1587
Phaseolus bean	31.561	Phaseolus bean	31.561	Flax	32.0284	Flax	33.0466	Wetland rice	34.0875	Flax	29.3135	Flax	32.8769	Flax	32.5375	Phaseolus bean	31.561	Flax	32.5375	Sunflower	31.1121	Phaseolus bean	31.561	Sunflower	31.6238	Flax	31.8588	Sunflower	31.1121	Sunflower	30.0888	Flax	31.6891	Flax	31.6891	Flax	33.0466	Flax	35.5919	Flax	32.0284	Flax	31.6891		Flax	32.0284
Flax	31.3497	Flax	31.3497	Phaseolus bean	31.3297	Phaseolus bean	30.9828	Peal millet	33	Sunflower	29.0656	Phaseolus bean	31.0407	Phaseolus bean	31.1563	Flax	31.3497	Phaseolus bean	31.1563	Flax	30.671	Flax	31.3497	Flax	31.0103	Phaseolus bean	31.3876	Flax	30.671	Flax	29.9922	Phaseolus bean	31.4454	Phaseolus bean	31.4454	Phaseolus bean	30.9828	Peal millet	32.5742	Phaseolus bean	31.3297	Phaseolus bean	31.4454		Phaseolus bean	31.3297
Dry pea	29.639	Dry pea	29.639	Dry pea	30.0114	Wetland rice	30.6098	Dry pea	31.2219	Dry pea	28.5217	Dry pea	30.477	Dry pea	30.2908	Dry pea	29.639	Dry pea	30.2908	Dry pea	29.2665	Dry pea	29.639	Dry pea	29.4528	Dry pea	29.9183	Dry pea	29.2665	Dry pea	28.8941	Dry pea	29.8252	Dry pea	29.8252	Wetland rice	30.6098	Dry pea	31.9668	Dry pea	30.0114	Dry pea	29.8252		Dry pea	30.0114
Oat	26.3068	Oat	26.3068	Wetland rice	27.6289	Dry pea	30.5701	Phaseolus bean	30.5781	Oat	25.5462	Wetland rice	30.113	Wetland rice	29.1194	Oat	26.3068	Wetland rice	29.1194	Oat	26.0533	Oat	26.3068	Oat	26.1801	Wetland rice	27.1321	Oat	26.0533	Oat	25.7998	Wetland rice	26.6353	Wetland rice	26.6353	Dry pea	30.5701	Wheat	30.5056	Wetland rice	27.6289	Wetland rice	26.6353		Wetland rice	27.6289
Wetland rice	25.6417	Wetland rice	25.6417	Oat	26.5604	Oat	26.9407	Wheat	28.5	Pigeonpea	24.1645	Oat	26.8773	Oat	26.7505	Wetland rice	25.6417	Oat	26.7505	Pigeonpea	24.4614	Wetland rice	25.6417	Wetland rice	24.648	Oat	26.497	Pigeonpea	24.4614	Pigeonpea	24.313	Oat	26.4336	Oat	26.4336	Oat	26.9407	Phaseolus bean	30.1156	Oat	26.5604	Oat	26.4336		Oat	26.5604
Pigeonpea	24.6098	Pigeonpea	24.6098	Wheat	25.2409	Wheat	26.7451	Oat	27.3844	Groundnut	23.0012	Wheat	26.4944	Wheat	25.993	Pigeonpea	24.6098	Wheat	25.993	Groundnut	23.9301	Pigeonpea	24.6098	Pigeonpea	24.5356	Wheat	24.9902	Groundnut	23.9301	Groundnut	23.4657	Wheat	24.7395	Wheat	24.7395	Wheat	26.7451	Oat	27.8914	Wheat	25.2409	Wheat	24.7395		Wheat	25.2409
Groundnut	24.3946	Groundnut	24.3946	Groundnut	24.8591	Groundnut	25.5559	Groundnut	26.3688	Quinoa	22.5997	Groundnut	25.4398	Groundnut	25.2075	Groundnut	24.3946	Groundnut	25.2075	Wetland rice	23.6544	Groundnut	24.3946	Groundnut	24.1624	Groundnut	24.743	Wetland rice	23.6544	Quinoa	22.9993	Pigeonpea	24.684	Pigeonpea	24.684	Groundnut	25.5559	Groundnut	27.2977	Groundnut	24.8591	Pigeonpea	24.684		Groundnut	24.8591
Wheat	24.2381	Wheat	24.2381	Pigeonpea	24.7582	Pigeonpea	24.9809	Quinoa	25.4969	Wheat	21.2297	Pigeonpea	24.9438	Pigeonpea	24.8696	Wheat	24.2381	Pigeonpea	24.8696	Quinoa	23.3989	Wheat	24.2381	Wheat	23.7367	Pigeonpea	24.7211	Quinoa	23.3989	Wheat	22.2325	Groundnut	24.6269	Groundnut	24.6269	Pigeonpea	24.9809	Quinoa	26.2961	Pigeonpea	24.7582	Groundnut	24.6269		Pigeonpea	24.7582
Quinoa	23.7985	Quinoa	23.7985	Quinoa	24.1981	Quinoa	24.7975	Pigeonpea	25.2406	Chickpea	20.961	Quinoa	24.6976	Quinoa	24.4978	Quinoa	23.7985	Quinoa	24.4978	Wheat	23.2353	Quinoa	23.7985	Quinoa	23.5987	Quinoa	24.0982	Wheat	23.2353	Wetland rice	21.6672	Quinoa	23.9983	Quinoa	23.9983	Quinoa	24.7975	Pigeonpea	25.5375	Quinoa	24.1981	Quinoa	23.9983		Quinoa	24.1981
Chickpea	21.8991	Chickpea	21.8991	Chickpea	22.2118	Chickpea	22.6809	Chickpea	23.2281	Wetland rice	19.6799	Chickpea	22.6027	Chickpea	22.4463	Chickpea	21.8991	Chickpea	22.4463	Chickpea	21.5864	Chickpea	21.8991	Chickpea	21.7428	Chickpea	22.1336	Chickpea	21.5864	Chickpea	21.2737	Chickpea	22.0555	Chickpea	22.0555	Chickpea	22.6809	Chickpea	23.8535	Chickpea	22.2118	Chickpea	22.0555		Chickpea	22.2118
Rye	16.5824	Rye	16.5824	Rye	17.152	Rye	18.0064	Rye	19.0031	Biomass sorghum	15.302	Rye	17.864	Rye	17.5792	Rye	16.5824	Rye	17.5792	Rye	16.0129	Rye	16.5824	Rye	16.2977	Rye	17.0096	Rye	16.0129	Rye	15.4433	Rye	16.8672	Rye	16.8672	Rye	18.0064	Rye	20.1423	Rye	17.152	Rye	16.8672		Rye	17.152
Foxtail millet	16.25	Foxtail millet	16.25	Foxtail millet	16.6912	Foxtail millet	17.3529	Foxtail millet	18.125	Sorghum	15.302	Foxtail millet	17.2426	Foxtail millet	17.0221	Foxtail millet	16.25	Foxtail millet	17.0221	Foxtail millet	15.8088	Foxtail millet	16.25	Foxtail millet	16.0294	Foxtail millet	16.5809	Foxtail millet	15.8088	Foxtail millet	15.3676	Foxtail millet	16.4706	Foxtail millet	16.4706	Foxtail millet	17.3529	Foxtail millet	19.0074	Foxtail millet	16.6912	Foxtail millet	16.4706		Foxtail millet	16.6912
Biomass sorghum	15.4667	Biomass sorghum	15.4667	Biomass sorghum	15.5216	Buckwheat	15.8529	Buckwheat	16.8125	Foxtail millet	14.9265	Buckwheat	15.7159	Biomass sorghum	15.5627	Biomass sorghum	15.4667	Biomass sorghum	15.5627	Biomass sorghum	15.4118	Biomass sorghum	15.4667	Biomass sorghum	15.4392	Biomass sorghum	15.5078	Biomass sorghum	15.4118	Biomass sorghum	15.3569	Biomass sorghum	15.4941	Biomass sorghum	15.4941	Buckwheat	15.8529	Buckwheat	17.9091	Biomass sorghum	15.5216	Biomass sorghum	15.4941		Biomass sorghum	15.5216
Sorghum	15.4667	Sorghum	15.4667	Sorghum	15.5216	Biomass sorghum	15.6039	Barley	16.1187	Rye	14.8737	Biomass sorghum	15.5902	Sorghum	15.5627	Sorghum	15.4667	Sorghum	15.5627	Sorghum	15.4118	Sorghum	15.4667	Sorghum	15.4392	Sorghum	15.5078	Sorghum	15.4118	Sorghum	15.3569	Sorghum	15.4941	Sorghum	15.4941	Biomass sorghum	15.6039	Barley	16.8965	Sorghum	15.5216	Sorghum	15.4941		Sorghum	15.5216
Buckwheat	14.4821	Buckwheat	14.4821	Buckwheat	15.0305	Sorghum	15.6039	Biomass sorghum	15.7	Barley	13.2995	Sorghum	15.5902	Buckwheat	15.4417	Buckwheat	14.4821	Buckwheat	15.4417	Barley	14.0772	Buckwheat	14.4821	Barley	14.2716	Buckwheat	14.8934	Barley	14.0772	Barley	13.6883	Buckwheat	14.7563	Buckwheat	14.7563	Sorghum	15.6039	Biomass sorghum	15.8098	Buckwheat	15.0305	Buckwheat	14.7563		Buckwheat	15.0305
Barley	14.4661	Barley	14.4661	Barley	14.8549	Barley	15.4382	Sorghum	15.7	Buckwheat	12.8372	Barley	15.341	Barley	15.1466	Barley	14.4661	Barley	15.1466	Buckwheat	13.9338	Barley	14.4661	Buckwheat	14.208	Barley	14.7577	Buckwheat	13.9338	Buckwheat	13.3855	Barley	14.6605	Barley	14.6605	Barley	15.4382	Sorghum	15.8098	Barley	14.8549	Barley	14.6605		Barley	14.8549
Coconut	10.8265	Coconut	10.8265	Coconut	10.8239	Dry rice	11.0804	Dry rice	11.9625	Coconut	10.8342	Dry rice	10.9544	Coconut	10.822	Coconut	10.8265	Coconut	10.822	Coconut	10.829	Coconut	10.8265	Coconut	10.8278	Coconut	10.8246	Coconut	10.829	Coconut	10.8316	Coconut	10.8252	Coconut	10.8252	Dry rice	11.0804	Dry rice	12.9706	Coconut	10.8239	Coconut	10.8252		Coconut	10.8239
Dry rice	9.82024	Dry rice	9.82024	Dry rice	10.3243	Coconut	10.8201	Coconut	10.8156	Dry rice	8.30805	Coconut	10.8207	Dry rice	10.7023	Dry rice	9.82024	Dry rice	10.7023	Dry rice	9.31618	Dry rice	9.82024	Dry rice	9.56821	Dry rice	10.1983	Dry rice	9.31618	Dry rice	8.81211	Dry rice	10.0723	Dry rice	10.0723	Coconut	10.8201	Coconut	10.8105	Dry rice	10.3243	Dry rice	10.0723		Dry rice	10.3243
Alfalfa	5.89524	Alfalfa	5.89524	Alfalfa	6.08459	Alfalfa	6.36863	Alfalfa	6.7	Alfalfa	5.32717	Alfalfa	6.32129	Alfalfa	6.22661	Alfalfa	5.89524	Alfalfa	6.22661	Alfalfa	5.70588	Alfalfa	5.89524	Alfalfa	5.80056	Alfalfa	6.03725	Alfalfa	5.70588	Alfalfa	5.51653	Alfalfa	5.98992	Alfalfa	5.98992	Alfalfa	6.36863	Alfalfa	7.07871	Alfalfa	6.08459	Alfalfa	5.98992		Alfalfa	6.08459
Cassava	3.19583	Cassava	3.19583	Cassava	3.20417	Cassava	3.21667	Cassava	3.23125	Cassava	3.17083	Cassava	3.21458	Cassava	3.21042	Cassava	3.19583	Cassava	3.21042	Cassava	3.1875	Cassava	3.19583	Cassava	3.19167	Cassava	3.20208	Cassava	3.1875	Cassava	3.17917	Cassava	3.2	Cassava	3.2	Cassava	3.21667	Cassava	3.24792	Cassava	3.20417	Cassava	3.2		Cassava	3.20417
Sweet potato	2.79732	Sweet potato	2.79732	Sweet potato	2.80604	Sweet potato	2.81912	Sweet potato	2.83437	Sweet potato	2.77117	Sweet potato	2.81694	Sweet potato	2.81258	Sweet potato	2.79732	Sweet potato	2.81258	Sweet potato	2.7886	Sweet potato	2.79732	Sweet potato	2.79296	Sweet potato	2.80386	Sweet potato	2.7886	Sweet potato	2.77988	Sweet potato	2.80168	Sweet potato	2.80168	Sweet potato	2.81912	Sweet potato	2.85181	Sweet potato	2.80604	Sweet potato	2.80168		Sweet potato	2.80604
White potato	2.49881	White potato	2.49881	White potato	2.51968	White potato	2.55098	White potato	2.5875	White potato	2.4362	White potato	2.54576	White potato	2.53533	White potato	2.49881	White potato	2.53533	White potato	2.47794	White potato	2.49881	White potato	2.48838	White potato	2.51446	White potato	2.47794	White potato	2.45707	White potato	2.50924	White potato	2.50924	White potato	2.55098	White potato	2.62924	White potato	2.51968	White potato	2.50924		White potato	2.51968
Yam	2.39107	Yam	2.39107	Yam	2.38876	Yam	2.38529	Yam	2.38125	Yam	2.398	Yam	2.38587	Yam	2.38703	Yam	2.39107	Yam	2.38703	Yam	2.39338	Yam	2.39107	Yam	2.39223	Yam	2.38934	Yam	2.39338	Yam	2.39569	Yam	2.38992	Yam	2.38992	Yam	2.38529	Yam	2.37663	Yam	2.38876	Yam	2.38992		Yam	2.38876
Cabbage	1.98482	Cabbage	1.98482	Cabbage	1.97148	Cabbage	1.95147	Cabbage	1.92813	Cabbage	2.02484	Cabbage	1.95481	Cabbage	1.96148	Cabbage	1.98482	Cabbage	1.96148	Cabbage	1.99816	Cabbage	1.98482	Cabbage	1.99149	Cabbage	1.97482	Cabbage	1.99816	Cabbage	2.0115	Cabbage	1.97815	Cabbage	1.97815	Cabbage	1.95147	Carrot	1.93734	Cabbage	1.97148	Cabbage	1.97815		Cabbage	1.97148
Carrot	1.68393	Carrot	1.68393	Carrot	1.72447	Carrot	1.78529	Carrot	1.85625	Olive	1.79252	Carrot	1.77516	Carrot	1.75488	Carrot	1.68393	Carrot	1.75488	Olive	1.6489	Carrot	1.68393	Carrot	1.66366	Carrot	1.71434	Olive	1.6489	Olive	1.72071	Carrot	1.7042	Carrot	1.7042	Carrot	1.78529	Cabbage	1.90144	Carrot	1.72447	Carrot	1.7042		Carrot	1.72447
Olive	1.57708	Olive	1.57708	Olive	1.50527	Tomato	1.40833	Tomato	1.44063	Carrot	1.56229	Olive	1.4155	Olive	1.45141	Olive	1.57708	Olive	1.45141	Carrot	1.64338	Olive	1.57708	Olive	1.61299	Olive	1.52322	Carrot	1.64338	Carrot	1.60284	Olive	1.54118	Olive	1.54118	Tomato	1.40833	Tomato	1.47753	Olive	1.50527	Olive	1.54118		Olive	1.50527
Tomato	1.3622	Tomato	1.3622	Tomato	1.38065	Olive	1.39755	Banana	1.31875	Citrus	1.38636	Tomato	1.40372	Tomato	1.39449	Tomato	1.3622	Tomato	1.39449	Citrus	1.35478	Tomato	1.3622	Tomato	1.35298	Tomato	1.37604	Citrus	1.35478	Citrus	1.37057	Tomato	1.37143	Tomato	1.37143	Olive	1.39755	Onion	1.36771	Tomato	1.38065	Tomato	1.37143		Tomato	1.38065
Citrus	1.33899	Citrus	1.33899	Citrus	1.3232	Citrus	1.29951	Onion	1.30938	Tomato	1.30685	Citrus	1.30346	Citrus	1.31135	Citrus	1.33899	Citrus	1.31135	Tomato	1.34375	Citrus	1.33899	Citrus	1.34688	Citrus	1.32714	Tomato	1.34375	Tomato	1.3253	Citrus	1.33109	Citrus	1.33109	Citrus	1.29951	Banana	1.34354	Citrus	1.3232	Citrus	1.33109		Citrus	1.3232
Banana	1.26607	Banana	1.26607	Banana	1.27847	Banana	1.29706	Citrus	1.27188	Banana	1.22889	Banana	1.29396	Banana	1.28776	Banana	1.26607	Banana	1.28776	Banana	1.25368	Banana	1.26607	Banana	1.25987	Banana	1.27537	Banana	1.25368	Banana	1.24128	Banana	1.27227	Banana	1.27227	Banana	1.29706	Citrus	1.24029	Banana	1.27847	Banana	1.27227		Banana	1.27847
Onion	1.18542	Onion	1.18542	Onion	1.21458	Onion	1.25833	Olive	1.27187	Onion	1.09792	Onion	1.25104	Onion	1.23646	Onion	1.18542	Onion	1.23646	Onion	1.15625	Onion	1.18542	Onion	1.17083	Onion	1.20729	Onion	1.15625	Onion	1.12708	Onion	1.2	Onion	1.2	Onion	1.25833	Olive	1.12825	Onion	1.21458	Onion	1.2		Onion	1.21458
Oil palm	0.294643	Oil palm	0.294643	Oil palm	0.276786	Oil palm	0.25	Oil palm	0.21875	Oil palm	0.348214	Oil palm	0.254464	Oil palm	0.263393	Oil palm	0.294643	Oil palm	0.263393	Oil palm	0.3125	Oil palm	0.294643	Oil palm	0.303571	Oil palm	0.28125	Oil palm	0.3125	Oil palm	0.330357	Oil palm	0.285714	Oil palm	0.285714	Oil palm	0.25	Oil palm	0.183036	Oil palm	0.276786	Oil palm	0.285714		Oil palm	0.276786
Tea	0.0627976	Tea	0.0627976	Tea	0.0649335	Tea	0.0681373	Tea	0.071875	Tea	0.0563901	Tea	0.0676033	Tea	0.0665354	Tea	0.0627976	Tea	0.0665354	Tea	0.0606618	Tea	0.0627976	Tea	0.0617297	Tea	0.0643995	Tea	0.0606618	Tea	0.0585259	Tea	0.0638655	Tea	0.0638655	Tea	0.0681373	Tea	0.0761467	Tea	0.0649335	Tea	0.0638655		Tea	0.0649335
Rapeseed	0	Rapeseed	0	Rapeseed	0	Rapeseed	0	Rapeseed	0	Rapeseed	0	Rapeseed	0	Rapeseed	0	Rapeseed	0	Rapeseed	0	Rapeseed	0	Rapeseed	0	Rapeseed	0	Rapeseed	0	Rapeseed	0	Rapeseed	0	Rapeseed	0	Rapeseed	0	Rapeseed	0	Rapeseed	0	Rapeseed	0	Rapeseed	0		Rapeseed	0
Note: This dataset reports the Combined Nutrient Scores for each crop across 21 regions, including Northern, Western, Eastern and Southern Africa; Central, Eastern, Southern, Southeastern and Western Asia; Northern, Western, Southern and Eastern Europe; Australia/New Zealand; Melanesia; Micronesia; Polynesia; Northern and Central America; the Caribbean; and South America. The CNS represents each …

## Sheet: SD 2_Cowpea
Supplementary Data 2 | Regional yield potential and nutrient supply capacity of cowpea
Region	Cowpea (ton/ha)	Iron (mg/ha)	WRA/IronHA	Zinc (mg/ha)	WRA/ZincHA
Caribbean	2.37	235815	10527.5	161397	15823.2
Eastern Africa	1.76	175120	7817.86	119856	11750.6
Middle Africa	1.65	164175	7329.24	112365	11016.2
Polynesia	1.42	141290	6307.59	96702	9480.59
Southeastern Asia	1.39	138305	6174.33	94659	9280.29
Central America	1.24	123380	5508.04	84444	8278.82
South America	1.24	123380	5508.04	84444	8278.82
Melanesia	1.04	103480	4619.64	70824	6943.53
Western Africa	0.99	98505	4397.54	67419	6609.71
Southern Asia	0.98	97510	4353.12	66738	6542.94
Southern Africa	0.73	72635	3242.63	49713	4873.82
Global Average	0.725217	72159.1	3221.39	49387.3	4841.89
Australia/New Zealand	0.38	37810	1687.95	25878	2537.06
Eastern Asia	0.37	36815	1643.53	25197	2470.29
Southern Europe	0.36	35820	1599.11	24516	2403.53
Western Europe	0.31	30845	1377.01	21111	2069.71
Northern Africa	0.26	25870	1154.91	17706	1735.88
Northern America	0.11	10945	488.616	7491	734.412
Western Asia	0.06	5970	266.518	4086	400.588
Central Asia	0.01	995	44.4196	681	66.7647
Eastern Europe	0.01	995	44.4196	681	66.7647
European Russia	0	0	0	0	0
Micronesia	0	0	0	0	0
Northern Europe	0	0	0	0	0
Note: This dataset reports the average yield potential (t ha⁻¹) and corresponding nutrient yield (mg ha⁻¹) of cowpea across global regions and corresponding estimates of women of reproductive age (WRA) whose daily iron (WRA Fe ha⁻¹) and zinc (WRA Zn ha⁻¹) requirements could be met from one hectare, based on each crop’s nutrient composition.

## Sheet: SD 3_Soybean
Supplementary Data 3 | Regional yield potential and nutrient supply capacity of soybeans
Region	Soybean (ton/ha)	Iron (mg/ha)	WRA/IronHa	Zinc (mg/ha)	WRA/ZincHA
Eastern Europe	2.78	436460	19484.8	135942	13327.6
Caribbean	2.67	419190	18713.8	130563	12800.3
Western Europe	2.28	357960	15980.4	111492	10930.6
Middle Africa	2.19	343830	15349.6	107091	10499.1
Eastern Africa	1.95	306150	13667.4	95355	9348.53
South America	1.71	268470	11985.3	83619	8197.94
Southeastern Asia	1.38	216660	9672.32	67482	6615.88
European Russia	1.28	200960	8971.43	62592	6136.47
Western Africa	1.2	188400	8410.71	58680	5752.94
Global Average	1.13609	178366	7962.75	55554.7	5446.53
Polynesia	1.11	174270	7779.91	54279	5321.47
Southern Asia	1.1	172700	7709.82	53790	5273.53
Melanesia	1.08	169560	7569.64	52812	5177.65
Central America	1.02	160140	7149.11	49878	4890
Southern Europe	0.92	144440	6448.21	44988	4410.59
Eastern Asia	0.91	142870	6378.12	44499	4362.65
Southern Africa	0.7	109900	4906.25	34230	3355.88
Northern America	0.55	86350	3854.91	26895	2636.76
Australia/New Zealand	0.49	76930	3434.38	23961	2349.12
Northern Africa	0.33	51810	2312.95	16137	1582.06
Northern Europe	0.21	32970	1471.88	10269	1006.76
Central Asia	0.15	23550	1051.34	7335	719.118
Western Asia	0.12	18840	841.071	5868	575.294
Micronesia	0	0	0	0	0
Note: This dataset reports the average yield potential (t ha⁻¹) and corresponding nutrient yield (mg ha⁻¹) of soybeans across global regions and corresponding estimates of women of reproductive age (WRA) whose daily iron (WRA Fe ha⁻¹) and zinc (WRA Zn ha⁻¹) requirements could be met from one hectare, based on each crop’s nutrient composition.

## Sheet: SD 4_ common beans
Supplementary Data 4 | Regional yield potential and nutrient supply capacity of common beans
Region	Phaseolus Beans (ton/ha)	Iron (mg/ha)	WRA/IronHa	Zinc (mg/ha)	WRA/ZincHa
Western Europe	3.48	261348	11667.3	98136	9621.18
Caribbean	3.26	244826	10929.7	91932	9012.94
Eastern Europe	3.25	244075	10896.2	91650	8985.29
Eastern Africa	2.51	188501	8415.22	70782	6939.41
Polynesia	2.3	172730	7711.16	64860	6358.82
Southeastern Asia	2.28	171228	7644.11	64296	6303.53
Middle Africa	2.21	165971	7409.42	62322	6110
Southern Europe	2.2	165220	7375.89	62040	6082.35
Melanesia	2	150200	6705.36	56400	5529.41
South America	1.97	147947	6604.78	55554	5446.47
Central America	1.88	141188	6303.04	53016	5197.65
Global Average	1.61957	121629	5429.88	45671.7	4477.62
European Russia	1.6	120160	5364.29	45120	4423.53
Southern Asia	1.44	108144	4827.86	40608	3981.18
Western Africa	1.28	96128	4291.43	36096	3538.82
Eastern Asia	1.19	89369	3989.69	33558	3290
Northern Europe	0.98	73598	3285.62	27636	2709.41
Southern Africa	0.82	61582	2749.2	23124	2267.06
Australia/New Zealand	0.75	56325	2514.51	21150	2073.53
Northern America	0.75	56325	2514.51	21150	2073.53
Western Asia	0.51	38301	1709.87	14382	1410
Northern Africa	0.41	30791	1374.6	11562	1133.53
Central Asia	0.18	13518	603.482	5076	497.647
Micronesia	0	0	0	0	0
Note: This dataset reports the average yield potential (t ha⁻¹) and corresponding nutrient yield (mg ha⁻¹) of common beans across global regions and corresponding estimates of women of reproductive age (WRA) whose daily iron (WRA Fe ha⁻¹) and zinc (WRA Zn ha⁻¹) requirements could be met from one hectare, based on each crop’s nutrient composition.

## Sheet: SD 5_Pearl millet
Supplementary Data 5 | Regional yield potential and nutrient supply capacity of pearl millet
Region	Pearl Millet (ton/ha)	Iron (mg/ha)	WRA/IronHa	Zinc (mg/ha)	WRA/ZincHa
Eastern Africa	1.91	152800	6821.43	59210	2643.3
Caribbean	1.38	110400	4928.57	42780	1909.82
Western Africa	1.34	107200	4785.71	41540	1854.46
Middle Africa	0.97	77600	3464.29	30070	1342.41
Southern Asia	0.93	74400	3321.43	28830	1287.05
Central America	0.84	67200	3000	26040	1162.5
Southern Africa	0.7	56000	2500	21700	968.75
Australia/New Zealand	0.65	52000	2321.43	20150	899.554
South America	0.48	38400	1714.29	14880	664.286
Global Average	0.443913	35513	1585.4	13761.3	614.344
Northern Africa	0.39	31200	1392.86	12090	539.732
Southeastern Asia	0.36	28800	1285.71	11160	498.214
Polynesia	0.22	17600	785.714	6820	304.464
Melanesia	0.03	2400	107.143	930	41.5179
Western Asia	0.01	800	35.7143	310	13.8393
Central Asia	0	0	0	0	0
Eastern Asia	0	0	0	0	0
Eastern Europe	0	0	0	0	0
European Russia	0	0	0	0	0
Micronesia	0	0	0	0	0
Northern America	0	0	0	0	0
Northern Europe	0	0	0	0	0
Southern Europe	0	0	0	0	0
Western Europe	0	0	0	0	0
Note: This dataset reports the average yield potential (t ha⁻¹) and corresponding nutrient yield (mg ha⁻¹) of pearl millet across global regions and corresponding estimates of women of reproductive age (WRA) whose daily iron (WRA Fe ha⁻¹) and zinc (WRA Zn ha⁻¹) requirements could be met from one hectare, based on each crop’s nutrient composition.

## Sheet: SD 6_Iron and Zinc Deficiency
Supplementary Data 6 | Regional prevalence of iron and zinc deficiencies used in deficiency weighting and clustering analyses
Global_Region	Iron_Subregion	Zinc_Subregion
Northern Africa	31.58	16.16
Western Africa	48.0182	24.9929
Middle Africa	45.9167	28.3857
Eastern Africa	32.4778	25.1
Southern Africa	31.4625	32.1286
Central Asia	30.22	8.76
Eastern Asia	19.35	14.48
Southern Asia	41.8375	28.9429
Southeastern Asia	33.7857	17.7571
Western Asia	26.1643	17.9143
Northern Europe	14.9222	6.35556
Western Europe	10.9125	5.5875
Southern Europe	13.5167	6.5
Eastern Europe	21.0889	12.3333
Australia/New Zealand	9.45	4.1
Melanesia	33.15	11.575
Micronesia	24.2667	13.6333
Polynesia	23.8667	13.4333
Northern America	12.5	9.96667
Central America	15.3	21.9857
Caribbean	20.8	12.5
South America	19.5833	10.8091
European Russia	0	0
Global	22.41	13.74
Note: This dataset provides the prevalence of iron and zinc deficiencies across global regions. These values were used to calculate nutrient-deficiency weights and to inform the multivariate clustering of crop yield potential and nutritional need.

## Sheet: SD_7_Food supply (g_cap_d)
Supplementary Data 7 | Regional food supply data from FAO Food Balance Sheets (FBS, 2022)
Reions	Total food supply (g/cap/d)	CowpeaTotal	Cowpea %	Beans Total	Beans %	Soybean Total	Soybean %	Millet Total	Millet %				Region (Yield)	Cowpea_NYP	PB_NYP	Soybean_NYP	PM_NYP
Australia and New Zealand	1541.66	0	0	9.26	0.600651	4.26	0.276326	0	0				Eastern Africa	74.26	72.13	70.14	100
Caribbean	1635.43	1.9	0.116177	14.06	0.859713	19.32	1.18134	0	0				Caribbean	100	93.68	96.04	72.25
Central America	1503.15	0	0	23.11	1.53744	13.79	0.917407	0	0				Western Africa	41.77	36.78	43.17	70.16
Central Asia	2347.23	0	0	7.19	0.306319	0.85	0.0362129	0.3	0.012781				Middle Africa	69.62	63.51	78.78	50.79
Eastern Africa	1089.77	2.11	0.193619	25.56	2.34545	3.88	0.356038	6.99	0.64142				Southern Asia	41.35	41.38	39.57	48.69
Eastern Asia	2311.68	0.06	0.00259551	1.59	0.0687811	30.54	1.32112	1.84	0.0795958				Central America	52.32	54.02	36.69	43.98
Eastern Europe	1782.27	0	0	1.07	0.0600358	4.36	0.244632	1.1	0.061719				Southeastern Asia	58.65	23.56	49.64	36.65
Melanesia	1639.9	0	0	0.08	0.00487835	4	0.243917	0.02	0.00121959				Southern Africa	30.8	23.56	25.18	36.65
Micronesia	1462.92	0.01	0.000683564	0.13	0.00888634	13.95	0.953572	0	0				Australia and New Zealand	16.03	21.55	17.63	34.03
Middle Africa	1393.55	3.18	0.228194	13.03	0.935022	2.33	0.167199	8.86	0.635786				South America	52.32	56.61	61.51	25.13
Northern Africa	1602.13	1.58	0.0986187	1.79	0.111726	16.13	1.00678	8.16	0.509322				Northern Africa	10.97	11.78	11.87	20.42
Northern America	1819.79	0	0	7.59	0.417081	34.23	1.88099	0	0				Polynesia	59.92	66.09	39.93	11.52
Northern Europe	1655.13	0	0	0.4	0.0241673	8.6	0.519597	0	0				Melanesia	43.88	57.47	38.85	1.57
Polynesia	1604.26	0	0	0.79	0.0492439	5.52	0.344084	0	0				Western Asia	2.53	14.66	4.32	0.52
South America	1585.79	0.01	0.000630601	20.65	1.30219	24.33	1.53425	0	0				Central Asia	0.42	5.17	5.4	0
South-eastern Asia	1245.94	0.34	0.0272886	3.2	0.256834	19.35	1.55304	0.15	0.0120391				Eastern Asia	15.61	34.2	32.73	0
Southern Africa	1072.51	0.19	0.0177155	2.36	0.220045	12.31	1.14777	1.72	0.160371				Eastern Europe	0.42	93.39	100	0
Southern Asia	1398.15	0.05	0.00357615	9.16	0.655151	6.16	0.440582	13.85	0.990595				Micronesia	0	0	0	0
Southern Europe	1741.31	0.06	0.00344568	4.36	0.250386	9.32	0.535229	0	0				Northern America	4.64	21.55	19.78	0
Western Africa	1393.04	28.55	2.04947	2.79	0.200281	3.89	0.279245	36.34	2.60868				Northern Europe	0	28.16	7.55	0
Western Asia	1677.78	0.55	0.0327814	4.17	0.248543	3.83	0.228278	0.65	0.0387417				Southern Europe	15.19	63.22	33.09	0
Western Europe	1697.27	0.01	0.000589181	0.89	0.0524371	12.94	0.762401	0.14	0.00824854				Western Europe	13.08	100	82.01	0
Grand Total	35200.7	38.6	0.109657	153.23	0.435304	253.89	0.721265	80.12	0.227609
This dataset contains regional food supply values (g cap⁻¹ d⁻¹) for selected crops, compiled from the 2022 FAO Food Balance Sheets. The data represent national-level (grouped into subregional) food availability, including both direct consumption and processed forms, and were used to compare current food supply with attainable yield potential (YP) across regions.

## Sheet: Cluster
Summary of Multivariate Clusters (Iron & Zinc Deficiency × Average Yield Potential)
Cluster	Deficiency*	Yield Potential†	Concise Description
1 (blue)	Lowest – Fe ≈ 14%, Zn ≈ 8 %	Low–mod – generally the 2nd or 3rd lowest yields	Countries with the smallest Fe/Zn gaps but only modest agronomic upside; improvements in crop management could lift nutrition further.
2 (red)	Moderate–high – Fe ≈ 27 %, Zn ≈ 19 %	Highest overall – top yields for cowpea (2.1 t/ha) & pearl millet (1.7 t/ha)	High‑yield environments (e.g., Eastern Africa, Caribbean) where boosting crop output is already feasible and can quickly shrink remaining deficiencies.
3 (green)	Moderate – Fe ≈ 25 %, Zn ≈ 15 %	Mixed, mid‑range – strong for cowpea; middling for other crops	Diverse agro‑ecologies across South/Central America & SE Asia; balanced strategy needed—select high‑performing legumes while tackling residual micronutrient gaps.
4 (orange)	High Fe, mid Zn – Fe ≈ 28 %, Zn ≈ 14 %	Lowest – yields < 0.3 t/ha for most crops	Northern Africa & W/C Asia face deep agronomic constraints; agronomic/breeding interventions are priority before nutrition gains can materialise.
5 (purple)	Low–mod – Fe ≈ 16 %, Zn ≈ 9 %	Very high – best for beans (3.4 t/ha) & soybean (2.5 t/ha)	Temperate Europe shows excellent yield potential; incremental biofortification could push deficiencies toward minimal levels.
6 (gold)	Severest – Fe ≈ 42 %, Zn ≈ 29 %	Moderate – 2nd‑highest pearl millet (0.9 t/ha); solid legume yields	Southern/Western/Central Africa & S Asia: largest nutrition burden but reasonable capacity to respond via millet & legumes; dual focus on yield improvement and fortification is critical.
